# Supplementary material for: Efficacy of H2O2 inactivated bovine virus diarrhoea virus (BVDV) type 1 vaccine in mice
Source: PubMed Central journal article supplement (PMC10837870; doi:10.1186/s12917-024-03897-0), 2024-02-03

M NC NO PC 3%

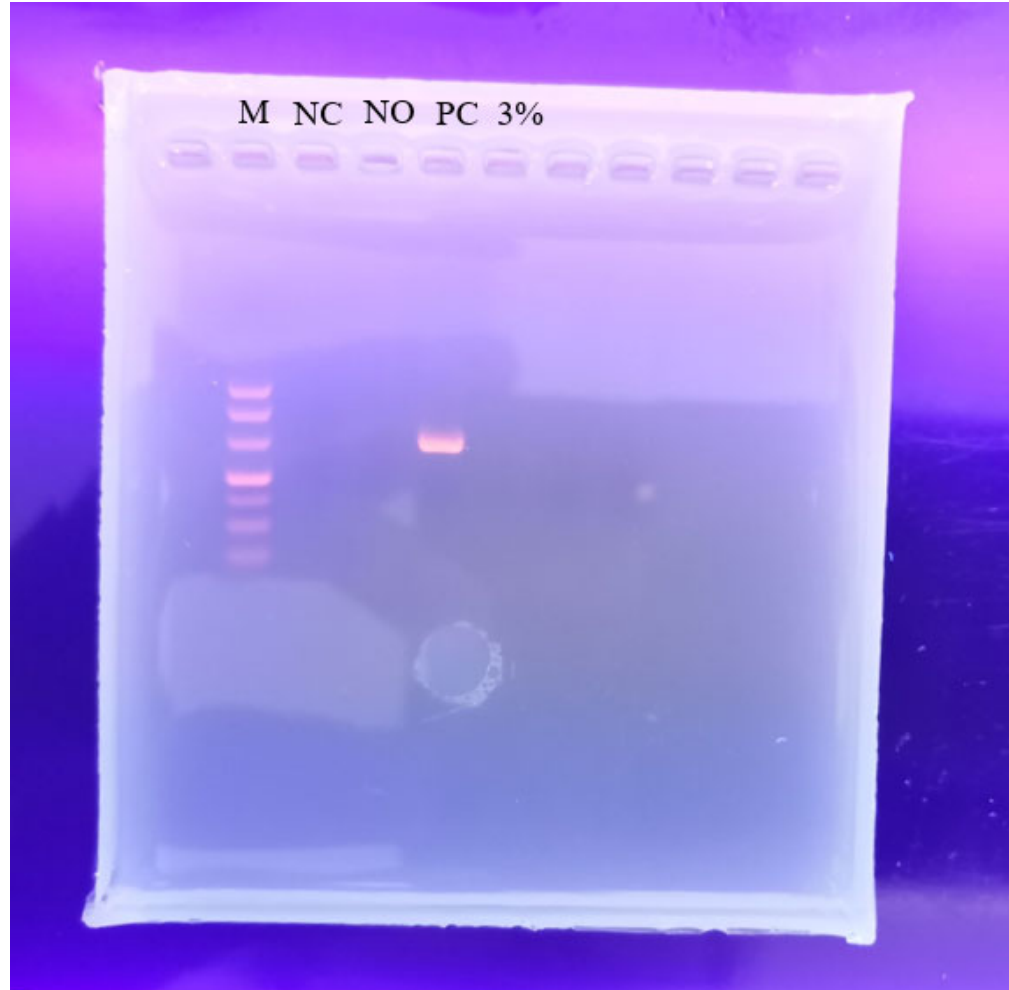

Supplement: 12917_2024_3897_MOESM1_ESM.pdf [file 12917_2024_3897_MOESM1_ESM.pdf]
